# Supplementary material for: Plant organellar DNA primase-helicase synthesizes RNA primers for organellar DNA polymerases using a unique recognition sequence
Source: PubMed Central journal article supplement — Nucleic Acids Res. 2017 Aug 30;45(18):10764–74. doi: 10.1093/nar/gkx745 (PMC5737085; doi:10.1093/nar/gkx745), 2017-08-30

1 **Fig1S. Amino acid sequence alignment between the primase domains of T7**  
2 **primase-helicase and AtTwinkle.** The six conserved motifs of prokaryotic primases  
3 are indicated by roman numbers. The identity of the catalytic conserved amino acids  
4 in the RNAP domain and the conserved cysteines that coordinate a zinc atom in the  
5 zinc finger of T7 primase are indicated by a red asterisk.

6  
7 **Fig 2S. Amino acid alignment of selected plant primase-helicases.** Amino acid  
8 alignment between selected plant Twinkles. The conserved cysteines and the  
9 catalytic amino acids in the RNAP domain are colored in black.

10  
11 **Fig. 3S AtTwinkle oligoribonucleotide synthesis using an array of 64**  
12 **trinucleotides sequences labeled with [ $\alpha$ -<sup>32</sup>P]-ATP.** The reaction contained  
13 individual oligonucleotides with the 5'-TTTTTTTXXXTTTTTTT--3' sequence. The  
14 identity of each deoxynucleotide is denoted by a color code. The identity of the 3'  
15 deoxynucleotide varies in each panel. Panel A contains an adenine, panel B contains  
16 a cytosine, panel C contains a guanosine and panel D contains a thymidine. Within  
17 each panel reactions 1 to 4 contained an adenine, 5 to 8 a cytosine, 9 to 12 a guanine  
18 and 13 to 16 a thymidine. Finally, each of the four groups contained an adenine,  
19 cytidine, guanine and thymidine in the first, second, third and four positions  
20 respectively). Primase reactions were carried out using 5  $\mu$ M of the synthetic  
21 template and 0.5  $\mu$ M of each recombinant AtPrimase-helicase.

22  
23 **Fig. 4S AtTwinkle oligoribonucleotide synthesis using an array of 64**  
24 **trinucleotides sequences labeled with [ $\alpha$ -<sup>32</sup>P]-CTP.** The experimental setup is  
25 equal to one described for Fig. 3S.

26  
27 **Fig. 5S AtTwinkle oligoribonucleotide synthesis using an array of 64**  
28 **trinucleotides sequences labeled with [ $\alpha$ -<sup>32</sup>P]-GTP.** The experimental setup is  
29 equal to one described for Fig. 3S.

31 **Fig. 6S AtTwinkle oligoribonucleotide synthesis using an array of 64**  
32 **trinucleotides sequences labeled with [ $\alpha$ -<sup>32</sup>P]-UTP.** The experimental setup is  
33 equal to one described for Fig. 3S.

34

35 **Fig. 7S Quantification of oligoribonucleotide synthesis by AtTwinkle in**  
36 **trinucleotides templates.** Graphical representation of the total amount of  
37 synthesized oligoribonucleotides in a GGA template as 100%. The percentage of  
38 each RNA product (2-mer to 8-mer) from the GGA template is indicated. The relative  
39 abundance of total RNA synthesis and its breakdown from 2-mer to 8-mers, in  
40 comparison to the synthesis in the GGA template, is indicated for the rest of the  
41 templates.

42

Fig. 1S

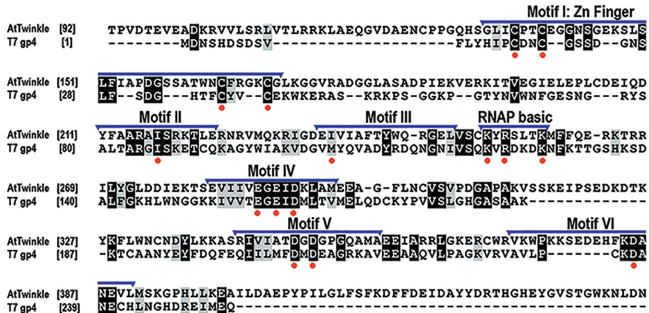



Beta vulgaris STHHSARLSVLMKMLELLELGHQSI-PG-QYSHLL... 233  
Camelina sativa KRGVSSKLVTRLRKRLAEQIDQNCN-PG-QYSGHLL... 235  
Solanum lycopersicum DTTESDHEKALKQLSQQVIGDIDGSCG-PG-QYNGHLL... 226  
Vitis vinifera TNSASRLNVLKRLKLELQVDFDQMLA-PG-QYSHLL... 235  
Tarenaya hassleriana KXIVLSRLNVLKRLKLELQVDFDQMLA-PG-QYSHLL... 235  
Lupinus angustifolius AKVEM-QFELLKRLKLAIGDITACV-PG-QYSHLL... 225  
Nelumbo nucifera ETIDISIRNALKRLKLELQVDFDQMLA-PG-QYSHLL... 225  
Noccaea caeruleascens KSDVYSLANLRLKRLKLELQVDFDQMLA-PG-QYSHLL... 225  
Juglans regia NGLDASQAKLTKLQKLELQVDFDQMLA-PG-QYSHLL... 289  
Eucalyptus grandis RGIDT-FVRLKRLKLELQVDFDQMLA-PG-QYSHLL... 249  
Musa acuminata EPIFAERLAKLTKLQKLELQVDFDQMLA-PG-QYSHLL... 224  
Nicotiana tomentosifoliosa GIAESHVYALKEKLELQVDFDQMLA-PG-QYSHLL... 228  
Pyrus x bretschneideri NQMSMQMLRLEKLELQVDFDQMLA-PG-QYSHLL... 239  
Brassica rapa GAVQV-RLANLRLKRLKLELQVDFDQMLA-PG-QYSHLL... 227  
Raphanus sativus DGAVQVSLANLRLKRLKLELQVDFDQMLA-PG-QYSHLL... 231  
Arabidopsis thaliana KRVLVSLRNLRLKRLKLELQVDFDQMLA-PG-QYSHLL... 230  
Theobroma cacao WFLMRSLSLELKLKLELQVDFDQMLA-PG-QYSHLL... 234  
Phoenix dactylopera RMIIDTRLAKLTKLQKLELQVDFDQMLA-PG-QYSHLL... 227  
Gossypium arboreum QPDSRSLIQLNHLKQLGIDITACV-PG-QYSHLL... 234  
Ricinus communis EDSKPHLEKRLKLELQVDFDQMLA-PG-QYSHLL... 232  
Malus domestica NQMSMQMLRLEKLELQVDFDQMLA-PG-QYSHLL... 239  
Manihot esculenta EVKSLKRLKRLKLELQVDFDQMLA-PG-QYSHLL... 229  
Cucumis melo KALSSSTLNLRLKRLKLELQVDFDQMLA-PG-QYSHLL... 254  
Gossypium hirsutum QPDSRSLIQLNHLKQLGIDITACV-PG-QYSHLL... 234  
Prunus mume KRVDENQLSRLLKLELQVDFDQMLA-PG-QYSHLL... 228  
Marchantia polymorpha EFPVFNNEKTRLEKLELQVDFDQMLA-PG-QYSHLL... 239  
Capsicum annuum ETAESEHMAKQLSQQVIGDIDGSCG-PG-QYSHLL... 221  
Nicotiana tabacum GIAESHVYALKEKLELQVDFDQMLA-PG-QYSHLL... 228  
Arachis ipaensis NEKER-RFNSLVKYLELQVDFDQMLA-PG-QYSHLL... 218  
Daucus carota DAKNSMRLSILNKLKLELQVDFDQMLA-PG-QYSHLL... 218  
Arachis duranensis NEKER-RFNSLVKYLELQVDFDQMLA-PG-QYSHLL... 218  
Orzyza sativa KKGCEQRLLQKLELQVDFDQMLA-PG-QYSHLL... 237  
Sorghum bicolor AAASEERLQKLELQVDFDQMLA-PG-QYSHLL... 243  
Citrus sinensis KMLDSRWSLELKLKLELQVDFDQMLA-PG-QYSHLL... 242  
Cynara cardunculus EIVDSQKRLKRLKLELQVDFDQMLA-PG-QYSHLL... 222  
Solanum tuberosum ETAESEHMAKQLSQQVIGDIDGSCG-PG-QYSHLL... 224  
Solanum pennellii DTTESDHEKALKQLSQQVIGDIDGSCG-PG-QYSHLL... 226  
Brachypodium distachyon KXACEERLQKLELQVDFDQMLA-PG-QYSHLL... 240  
Setaria italica KKAASEERLQKLELQVDFDQMLA-PG-QYSHLL... 244  
Vigna radiata KSVLEL-QFNILKRLKLELQVDFDQMLA-PG-QYSHLL... 224  
Brassica oleracea GAVQV-RLANLRLKRLKLELQVDFDQMLA-PG-QYSHLL... 227  
Medicago truncatula NQMSMQMLRLEKLELQVDFDQMLA-PG-QYSHLL... 219  
Zostera marina VDVVLEKRLKLELQVDFDQMLA-PG-QYSHLL... 219  
Erythranthe guttata QVQVKKQLKRLKLELQVDFDQMLA-PG-QYSHLL... 245  
Coccomyxa subellipsoidea -----TIRNLSVAGIILKQYA-PG-QYSHLL... 118  
Cicer arietinum ENKLEMQVGLKRLKLELQVDFDQMLA-PG-QYSHLL... 229  
Gossypium raimondii QPDSRSLIQLNHLKQLGIDITACV-PG-QYSHLL... 234  
Cucumis sativus KASSSTRNLRLKRLKLELQVDFDQMLA-PG-QYSHLL... 242  
Aegilops tauschii RARACEERLQVDFDQMLA-PG-QYSHLL... 195  
Amborella trichopoda DANVPERLRLKRLKLELQVDFDQMLA-PG-QYSHLL... 220  
Fragaria vesca ETIDQEGRECELRKLELQVDFDQMLA-PG-QYSHLL... 226  
Sesamum indicum QLVDEKLLMLRKLKLELQVDFDQMLA-PG-QYSHLL... 153  
Populus euphratica PEVKSLELRLKRLKLELQVDFDQMLA-PG-QYSHLL... 233  
Morus notabilis KNAS-QFRIKRLKLELQVDFDQMLA-PG-QYSHLL... 206  
Nicotiana glauca GIAESHVYALKEKLELQVDFDQMLA-PG-QYSHLL... 228  
Capsella rubella KRAVVSLRNLRLKRLKLELQVDFDQMLA-PG-QYSHLL... 226  
Arabis alpina KRAIVSNLANLRLKRLKLELQVDFDQMLA-PG-QYSHLL... 219  
Zea mays STAESEERLQKLELQVDFDQMLA-PG-QYSHLL... 249  
Jatropha curcas EDLQTLNKLKRLKLELQVDFDQMLA-PG-QYSHLL... 205  
Eutrema salsugineum KRAVQFRLANLRLKRLKLELQVDFDQMLA-PG-QYSHLL... 229  
Prunus persica KRVDENQLSRLLKLELQVDFDQMLA-PG-QYSHLL... 242  
Phaseolus vulgaris KSVLEL-QFNILKRLKLELQVDFDQMLA-PG-QYSHLL... 224  
Populus trichocarpa PEVKSLELRLKRLKLELQVDFDQMLA-PG-QYSHLL... 226  
Citrus clementina MLDSSRWSLELKLKLELQVDFDQMLA-PG-QYSHLL... 134  
Gentiana aurea SGVQVNSPELRLKLELQVDFDQMLA-PG-QYSHLL... 229  
Ostreococcus tauri AAQESTGPGFLKRLKLELQVDFDQMLA-PG-QYSHLL... 180  
Micromonas pusilla -----MQSYT-PG-QH-RTR... 126  
Selaginella moellendani -----MDDVT-LG-KEHRL... 117  
Ostreococcus lucimaris -----MDHRIVLQSYT-PG-QH-RTR... 127  
Micromonas comoda SPI-----ALRVLKLELQVDFDQMLA-PG-QYSHLL... 155  
Physcomitrella patens -----ALTKTVKQKLSKGLKLYG-PG-TVRG... 163

Beta vulgaris -----SVG-G--QVIAFTYRRNGVLVLSCKYRDV-TKFFWQ-----EADTDFLFGDDEKASASLIVVSE-DKAMEBGFNRCNSVFGAPFVSK-K-----DVPT---PDQTKYQVWLNCKEYFEKATIIILADGDFGQALSSEASBBERGRKRVME 378  
Camelina sativa -----RIG-D--QVIAFTYWRGELVLSCKYRVL-TKFFQW-----EADTDFLFGDDEKASASLIVVSE-DKAMEBGFNRCNSVFGAPFVSK-K-----DTPF---EKDTKYKFLWNCNDYLRKASIIILADGDFGQALSSEASBBERGRKRVME 379  
Solanum lycopersicum -----RHS-D--QVIAFTYWRGELVLSCKYRNM-TKFFQW-----EADTDFLFGDDEKASASLIVVSE-DKAMEBGFNRCNSVFGAPFVSK-K-----DLPF---VEKDTKYQVWLNCKEYLEKASIIILADGDFGQALSSEASBBERGRKRVME 371  
Vitis vinifera -----SYG-D--QVIAFTYRRNGVLVLSCKYRDV-NKFFWQ-----EKDTEFLFGDDEKASASLIVVSE-DKAMEBGFNRCNSVFGAPFVSK-K-----DTPF---AEKDTKYQVWLNCKEYLEKASIIILADGDFGQALSSEASBBERGRKRVME 380  
Tarenaya hassleriana -----RMS-D--EVAIAFTYWRGELVLSCKYRVL-TKFFQWVHVLIK-----TLFSEKDTDFLFGDDEKASASLIVVSE-DKAMEBGFNRCNSVFGAPFVSK-K-----EIPS---ESQDTKYKFLWNCNDYLRKASIIILADGDFGQALSSEASBBERGRKRVME 385  
Lupinus angustifolius -----KYY-D--QVIAFTYRRNGVLVLSCKYRDI-DKFFWQ-----EADTDFLFGDDEKASASLIVVSE-DKAMEBGFNRCNSVFGAPFVSK-K-----ELPF---EQDTKYQVWLNCKEYLEKASIIILADGDFGQALSSEASBBERGRKRVME 370  
Nelumbo nucifera GQVCGAIDGKGLLSLSSHG-NT-KIAIAFTYRRNGVLVLSCKYRDV-KFFWQW-----EKDTEFLFGDDEKASASLIVVSE-DKAMEBGFNRCNSVFGAPFVSK-K-----ELPS---IEKDTKYQVWLNCKEYLDKASIIILADGDFGQALSSEASBBERGRKRVME 443  
Noccaea caerulea -----RLGD--EIVIAFTYWRGELVLSCKYRFL-TKFFQW-----EKDTEFLFGDDEKASASLIVVSE-DKAMEBGFNRCNSVFGAPFVSK-K-----ETPF---EKDTKYKFLWNCNDYLRKASIIILADGDFGQALSSEASBBERGRKRVME 421  
Juglans regia -----RSG-D--QIAIAFTYRRNGVLVLSCKYRDI-NKFFWQ-----EVDTEFLFGDDEKASASLIVVSE-DKAMEBGFNRCNSVFGAPFVSK-K-----ELPF---EQDTKYQVWLNCKEYLEKASIIILADGDFGQALSSEASBBERGRKRVME 434  
Eucalyptus grandis -----RCE-N--QVIAFTYRRNGVLVLSCKYRDV-KKFFWQ-----EADTDFLFGDDEKASASLIVVSE-DKAMEBGFNRCNSVFGAPFVSK-K-----DTPF---EQDTKYQVWLNCKEYLDKASIIILADGDFGQALSSEASBBERGRKRVME 394  
Musa acuminata -----RGC-K--KIAIAFTYRRNGVLVLSCKYRDV-TKFFWQ-----EFDKDFLFGDDEKASASLIVVSE-DKAMEBGFNRCNSVFGAPFVSK-K-----DTPF---AEEDTKYQVWLNCKEYLEKASIIILADGDFGQALSSEASBBERGRKRVME 369  
Nicotiana tomentosif -----RSG-D--QVIAFTYRRNGVLVLSCKYRDI-TKFFWQ-----EADTDFLFGDDEKASASLIVVSE-DKAMEBGFNRCNSVFGAPFVSK-K-----ELPF---VDDTKYQVWLNCKEYLEKASIIILADGDFGQALSSEASBBERGRKRVME 373  
Pyrus x bretschneide -----STG-D--QIAIAFTYRRNGVLVLSCKYRDI-DKFFWQ-----EKDTEFLFGDDEKASASLIVVSE-DKAMEBGFNRCNSVFGAPFVSK-K-----ELPF---EKDTKYQVWLNCKEYLDKASIIILADGDFGQALSSEASBBERGRKRVME 384  
Brassica rapa -----RIG-D--EIVIAFTYWRGELVLSCKYRVL-TKFFQW-----EKDTEFLFGDDEKASASLIVVSE-DKAMEBGFNRCNSVFGAPFVSK-K-----ETPF---EKDTKYKFLWNCNDYLRKASIIILADGDFGQALSSEASBBERGRKRVME 372  
Raphanus sativus -----RIG-D--EIVIAFTYWRGELVLSCKYRVL-TKFFQW-----EKDTEFLFGDDEKASASLIVVSE-DKAMEBGFNRCNSVFGAPFVSK-K-----ETPF---EKDTKYKFLWNCNDYLRKASIIILADGDFGQALSSEASBBERGRKRVME 376  
Arabidopsis thaliana -----RSG-D--EIVIAFTYWRGELVLSCKYRDI-TKFFQW-----EKDTEFLFGDDEKASASLIVVSE-DKAMEBGFNRCNSVFGAPFVSK-K-----EIPS---EKDTKYKFLWNCNDYLRKASIIILADGDFGQALSSEASBBERGRKRVME 375  
Theobroma cacao -----RSG-E--EIAIAFTYRRNGVLVLSCKYRDI-AKFFWQ-----EKDTEFLFGDDEKASASLIVVSE-DKAMEBGFNRCNSVFGAPFVSK-K-----EIPA---EQDTKYQVWLNCKEYLDKASIIILADGDFGQALSSEASBBERGRKRVME 379  
Phoenix dactylifera -----LYN-N--QVIAFYSVRNGVLVLSCKYRVA-SKFFWQ-----EKDTEFLFGDDEKASASLIVVSE-DKAMEBGFNRCNSVFGAPFVSK-K-----DMPV---EKEDKPYQVWLNCKEYLDKASIIILADGDFGQALSSEASBBERGRKRVME 371  
Gossypium arboreum -----RSG-D--EIAIAFTYRRNGVLVLSCKYRDI-VKFFWQ-----EKDTEFLFGDDEKASASLIVVSE-DKAMEBGFNRCNSVFGAPFVSK-K-----EIPA---EQDTKYQVWLNCKEYFKKASIIILADGDFGQALSSEASBBERGRKRVME 379  
Ricinus communis -----SYG-N--QVIAFTYRRNGVLVLSCKYRDI-NKFFWQ-----ESDTEFLFGDDEKASASLIVVSE-DKAMEBGFNRCNSVFGAPFVSK-K-----ELPS---KEQDTKYQVWLNCKEYLDKASIIILADGDFGQALSSEASBBERGRKRVME 377  
Malus domestica -----STG-D--QIAIAFTYRRNGVLVLSCKYRDI-DKFFWQ-----EKDTEFLFGDDEKASASLIVVSE-DKAMEBGFNRCNSVFGAPFVSK-K-----ELPF---EKDTKYQVWLNCKEYLDKASIIILADGDFGQALSSEASBBERGRKRVME 384  
Manihot esculenta -----SYG-S--QIMIAFTYRRNGVLVLSCKYRDS-NKFFQW-----EKDTEFLFGDDEKASASLIVVSE-DKAMEBGFNRCNSVFGAPFVSK-K-----ELPF---EQDTKYQVWLNCKEYLNKASIIILADGDFGQALSSEASBBERGRKRVME 374  
Cucumis melo -----TFG-D--QIAIAFTYRRNGVLVLSCKYRDV-NKFFWQ-----EADTDFLFGDDEKASASLIVVSE-DKAMEBGFNRCNSVFGAPFVSK-K-----DVPF---ADQDKYQVWLNCKEYLNKASIIILADGDFGQALSSEASBBERGRKRVME 399  
Gossypium hirsutum -----RSG-D--EIAIAFTYRRNGVLVLSCKYRDI-AKFFWQ-----EKDTEFLFGDDEKASASLIVVSE-DKAMEBGFNRCNSVFGAPFVSK-K-----EIPA---EQDTKYQVWLNCKEYFKKASIIILADGDFGQALSSEASBBERGRKRVME 379  
Prunus mume -----TTT-V--QICIAFTYRRNGVLVLSCKYRDI-EKFFWQ-----EADTDFLFGDDEKASASLIVVSE-DKAMEBGFNRCNSVFGAPFVSK-K-----DTPF---AEQDTKYQVWLNCKEYLDKASIIILADGDFGQALSSEASBBERGRKRVME 373  
Xanthoxylum polymorph -----NNT-G--DVVIAFTYRRNGVLVLSCKYRDI-DKFFWQ-----EKDTEFLFGDDEKASASLIVVSE-DKAMEBGFNRCNSVFGAPFVSK-K-----DTPF---VDDTKYQVWLNCKEYLDKASIIILADGDFGQALSSEASBBERGRKRVME 416  
Capsicum annuum -----RYG-D--QVIAFTYRRNGVLVLSCKYRDM-AKFFWQ-----EADTDFLFGDDEKASASLIVVSE-DKAMEBGFNRCNSVFGAPFVSK-K-----ELPF---VDDTKYQVWLNCKEYLDKASIIILADGDFGQALSSEASBBERGRKRVME 366  
Nicotiana tabacum -----RYG-D--QVIAFTYRRNGVLVLSCKYRDI-TKFFWQ-----EADTDFLFGDDEKASASLIVVSE-DKAMEBGFNRCNSVFGAPFVSK-K-----ELPF---VDDTKYQVWLNCKEYLDKASIIILADGDFGQALSSEASBBERGRKRVME 373  
Arachis ipaensis -----KYD-D--QVIAFTYRRNGVLVLSCKYRDI-NKFFWQ-----EADTDFLFGDDEKASASLIVVSE-DKAMEBGFNRCNSVFGAPFVSK-K-----DLPF---REKDTKYQVWLNCKEYLDKASIIILADGDFGQALSSEASBBERGRKRVME 365  
Daucus carota -----RHD-D--KDAIAFTYRRNGVLVLSCKYRDI-NKFFWQ-----EADTDFLFGDDEKASASLIVVSE-DKAMEBGFNRCNSVFGAPFVSK-K-----EIPA---EQDTKYQVWLNCKEYLDKASIIILADGDFGQALSSEASBBERGRKRVME 347  
Arachis duranensis -----KYD-D--QVIAFTYRRNGVLVLSCKYRDI-NKFFWQ-----EADTDFLFGDDEKASASLIVVSE-DKAMEBGFNRCNSVFGAPFVSK-K-----DLPF---REKDTKYQVWLNCKEYLDKASIIILADGDFGQALSSEASBBERGRKRVME 365  
Orzya sativa -----MWN-N--KIVIAFTYRRNGVLVLSCKYRDI-EKFFWQ-----EADTDFLFGDDEKASASLIVVSE-DKAMEBGFNRCNSVFGAPFVSK-K-----KLPD---KQDKKYQVWLNCKEYLDKASIIILADGDFGQALSSEASBBERGRKRVME 381  
Sorghum bicolor -----NWS-N--KISIAFTYRRNGVLVLSCKYRVA-DKFFWQ-----EPDTEFLFGDDEKASASLIVVSE-DKAMEBGFNRCNSVFGAPFVSK-K-----KIPD---KEQDKKYQVWLNCKEYLDKASIIILADGDFGQALSSEASBBERGRKRVME 387  
Citrus sinensis -----RHS-H--EVIIAFTYRRNGVLVLSCKYRDI-NKFFWQ-----EKDTEFLFGDDEKASASLIVVSE-DKAMEBGFNRCNSVFGAPFVSK-K-----NVPF---EQDTKYQVWLNCKEYLDKASIIILADGDFGQALSSEASBBERGRKRVME 389  
Cynara cardunculus -----STG-D--QIAIAFTYRRNGVLVLSCKYRDI-TKFFWQ-----EKDTEFLFGDDEKASASLIVVSE-DKAMEBGFNRCNSVFGAPFVSK-K-----ELPS---EQDTKYQVWLNCKEYLDKASIIILADGDFGQALSSEASBBERGRKRVME 335  
Solanum tuberosum -----RHS-D--QVIAFTYRRNGVLVLSCKYRDM-TKFFWQ-----EADTDFLFGDDEKASASLIVVSE-DKAMEBGFNRCNSVFGAPFVSK-K-----DLPF---VDDTKYQVWLNCKEYLDKASIIILADGDFGQALSSEASBBERGRKRVME 369  
Solanum pennellii -----RHS-D--QVIAFTYRRNGVLVLSCKYRDM-TKFFWQ-----EADTDFLFGDDEKASASLIVVSE-DKAMEBGFNRCNSVFGAPFVSK-K-----DLPF---VEKDTKYQVWLNCKEYLDKASIIILADGDFGQALSSEASBBERGRKRVME 371  
Brachypodium distach -----KWN-K--KIVIAFTYRRNGVLVLSCKYRDI-NKFFWQ-----EPDTEFLFGDDEKASASLIVVSE-DKAMEBGFNRCNSVFGAPFVSK-K-----KLPD---KQDKKYQVWLNCKEYLDKASIIILADGDFGQALSSEASBBERGRKRVME 384  
Setaria italica -----KMK-N--KISIAFTYRRNGVLVLSCKYRDI-EKFFWQ-----EADTDFLFGDDEKASASLIVVSE-DKAMEBGFNRCNSVFGAPFVSK-K-----KIPD---KEQDKKYQVWLNCKEYLDKASIIILADGDFGQALSSEASBBERGRKRVME 389  
Vigna radiata -----RYG-D--EIVIAFTYWRGELVLSCKYRVL-TKFFQW-----EKDTEFLFGDDEKASASLIVVSE-DKAMEBGFNRCNSVFGAPFVSK-K-----DLPF---EQDTKYQVWLNCKEYLDKASIIILADGDFGQALSSEASBBERGRKRVME 368  
Brassica oleracea -----RIG-D--EIVIAFTYWRGELVLSCKYRVL-TKFFQW-----EKDTEFLFGDDEKASASLIVVSE-DKAMEBGFNRCNSVFGAPFVSK-K-----ETPF---EKDTKYKFLWNCNDYLRKASIIILADGDFGQALSSEASBBERGRKRVME 372  
Medicago truncatula -----KYD-D--QIVIAFTYRRNGVLVLSCKYRDV-NKFFWQ-----EADTDFLFGDDEKASASLIVVSE-DKAMEBGFNRCNSVFGAPFVSK-K-----ELPF---LEQDTKYQVWLNCKEYLDKASIIILADGDFGQALSSEASBBERGRKRVME 364  
Zostera marina -----KYD-N--KIVIAFTYRRNGVLVLSCKYRDI-NKFFWQ-----ENDAEFLFGDDEKASASLIVVSE-DKAMEBGFNRCNSVFGAPFVSK-K-----NMLD---KEKDTKYQVWLNCKEYLDKASIIILADGDFGQALSSEASBBERGRKRVME 363  
Fragaria vesca -----RTG-N--QVIAFTYRRNGVLVLSCKYRDI-TKFFWQ-----EADTDFLFGDDEKASASLIVVSE-DKAMEBGFNRCNSVFGAPFVSK-K-----SIAS---EEDTKYQVWLNCKEYLDKASIIILADGDFGQALSSEASBBERGRKRVME 390  
Coccomyxa subellipso -----Y-SSKH--TNAIAFTYRRNGVLVLSCKYRDI-EKFFWQ-----ASIFPFLFGDDEKASASLIVVSE-DKAMEBGFNRCNSVFGAPFVSK-K-----DLPF---PEADTKYQVWLNCKEYLDKASIIILADGDFGQALSSEASBBERGRKRVME 268  
Cicer arietinum -----KYD-D--QVIAFTYRRNGVLVLSCKYRDI-NKFFWQ-----EADTDFLFGDDEKASASLIVVSE-DKAMEBGFNRCNSVFGAPFVSK-K-----ELPF---RDQDTKYQVWLNCKEYLDKASIIILADGDFGQALSSEASBBERGRKRVME 374  
Gossypium raimondii -----RSG-D--EIAIAFTYRRNGVLVLSCKYRDI-AKFFWQ-----EKDTEFLFGDDEKASASLIVVSE-DKAMEBGFNRCNSVFGAPFVSK-K-----EIPA---EQDTKYQVWLNCKEYFKKASIIILADGDFGQALSSEASBBERGRKRVME 379  
Cucumis sativus -----RGN-N--QIAIAFTYRRNGVLVLSCKYRDA-NKFFWQ-----EPDTEFLFGDDEKASASLIVVSE-DKAMEBGFNRCNSVFGAPFVSK-K-----DVFP---ADQDKKYQVWLNCKEYLDKASIIILADGDFGQALSSEASBBERGRKRVME 387  
Aegilops tauschii -----KRN-N--KIVIAFTYRRNGVLVLSCKYRDI-EKFFWQ-----EADTDFLFGDDEKASASLIVVSE-DKAMEBGFNRCNSVFGAPFVSK-K-----ELPF---IEKDTKYQVWLNCKEYLDKASIIILADGDFGQALSSEASBBERGRKRVME 313  
Amborella trichopoda -----RMS-D--QVIAFTYRRNGVLVLSCKYRDI-EKFFWQ-----EKDTEFLFGDDEKASASLIVVSE-DKAMEBGFNRCNSVFGAPFVSK-K-----EIPA---EQDTKYQVWLNCKEYLDKASIIILADGDFGQALSSEASBBERGRKRVME 365  
Fragaria vesca -----RCSIT-D--QISIAFTYRRNGVLVLSCKYRDI-NKFFWQ-----EKDTEFLFGDDEKASASLIVVSE-DKAMEBGFNRCNSVFGAPFVSK-K-----DVFP---EQDTKYQVWLNCKEYLDKASIIILADGDFGQALSSEASBBERGRKRVME 375  
Sesamum indicum -----RTG-N--QVIAFTYRRNGVLVLSCKYRDI-TKFFWQ-----EADTDFLFGDDEKASASLIVVSE-DKAMEBGFNRCNSVFGAPFVSK-K-----ALPS---EEDTKYQVWLNCKEYLDKASIIILADGDFGQALSSEASBBERGRKRVME 298  
Populus euphratica -----GYG-D--QVIAFTYRRNGVLVLSCKYRDI-NKFFWQ-----EKDTEFLFGDDEKASASLIVVSE-DKAMEBGFNRCNSVFGAPFVSK-K-----ELPF---NQDTKYQVWLNCKEYLDKASIIILADGDFGQALSSEASBBERGRKRVME 380  
Morus notabilis -----RYG-D--QFAIAFTYRRNGVLVLSCKYRDI-NKFFWQ-----EADTDFLFGDDEKASASLIVVSE-DKAMEBGFNRCNSVFGAPFVSK-K-----DLPF---KEDTKYQVWLNCKEYLDKASIIILADGDFGQALSSEASBBERGRKRVME 351  
Nicotiana sylvestris -----RIG-D--QVIAFTYRRNGVLVLSCKYRDI-TKFFWQ-----EADTDFLFGDDEKASASLIVVSE-DKAMEBGFNRCNSVFGAPFVSK-K-----ELPF---VDDTKYQVWLNCKEYLDKASIIILADGDFGQALSSEASBBERGRKRVME 373  
Capsella rubella -----RIG-D--QVIAFTYWRGELVLSCKYRVL-TKFFQW-----EKDTEFLFGDDEKASASLIVVSE-DKAMEBGFNRCNSVFGAPFVSK-K-----ETPF---EKDTKYKFLWNCNDYLRKASIIILADGDFGQALSSEASBBERGRKRVME 381  
Arabis alpina -----RIG-D--EIVIAFTYWRGELVLSCKYRVL-TKFFQW-----EKDTEFLFGDDEKASASLIVVSE-DKAMEBGFNRCNSVFGAPFVSK-K-----ETPF---EEDTKYQVWLNCKEYLDKASIIILADGDFGQALSSEASBBERGRKRVME 364  
Zea mays -----MWN-N--KISIAFTYRRNGVLVLSCKYRVA-DKFFWQ-----EADTDFLFGDDEKASASLIVVSE-DKAMEBGFNRCNSVFGAPFVSK-K-----KIPD---QDQDKKYQVWLNCKEYLDKASIIILADGDFGQALSSEASBBERGRKRVME 439  
Jatropha curcas -----SYG-N--QICIAFTYRRNGVLVLSCKYRDS-TKFFWQ-----EKDTEFLFGDDEKASASLIVVSE-DKAMEBGFNRCNSVFGAPFVSK-K-----550DLPF---KQDKKYQVWLNCKEYLDKASIIILADGDFGQALSSEASBBERGRKRVME 350  
Eutrema salsugineum -----RIR-D--EIIIAFTYWRGELVLSCKYRSL-TKFFQW-----EKDTEFLFGDDEKASASLIVVSE-DKAMEBGFNRCNSVFGAPFVSK-K-----ETPF---EKDTKYKFLWNCNDYLRKASIIILADGDFGQALSSEASBBERGRKRVME 384  
Prunus persica -----TTG-V--QICIAFTYRRNGVLVLSCKYRDI-EKFFWQ-----EKDTEFLFGDDEKASASLIVVSE-DKAMEBGFNRCNSVFGAPFVSK-K-----DLPF---EQDTKYQVWLNCKEYLDKASIIILADGDFGQALSSEASBBERGRKRVME 277  
Phaseolus vulgaris -----KYE-D--QVIAFTYRRNGVLVLSCKYRDV-SKFFWQ-----EADTDFLFGDDEKASASLIVVSE-DKAMEBGFNRCNSVFGAPFVSK-K-----DLPF---PEQDKKYQVWLNCKEYLDKASIIILADGDFGQALSSEASBBERGRKRVME 369  
Populus trichocarpa -----GYG-D--QVIAFTYRRNGVLVLSCKYRDI-NKFFWQ-----EKDTEFLFGDDEKASASLIVVSE-DKAMEBGFNRCNSVFGAPFVSK-K-----ELPF---NQDTKYQVWLNCKEYLDKASIIILADGDFGQALSSEASBBERGRKRVME 323  
Citrus Clementina -----RHS-H--EVIIAFTYRRNGVLVLSCKYRDI-NKFFWQ-----EKDTEFLFGDDEKASASLIVVSE-DKAMEBGFNRCNSVFGAPFVSK-K-----DVPF---EQDTKYQVWLNCKEYLDKASIIILADGDFGQALSSEASBBERGRKRVME 279  
Gentiana aurea -----TKHN-N--TLVIAFTYRRNGVLVLSCKYRDI-EKFFWQ-----EADTDFLFGDDEKASASLIVVSE-DKAMEBGFNRCNSVFGAPFVSK-K-----EIPA---EEDTKYQVWLNCKEYLDKASIIILADGDFGQALSSEASBBERGRKRVME 326  
Ostreococcus tauri -----NVSPAGS-Y--VDALFFYRRNGVLVLSCKYRDI-EKFFWQ-----VKGAEFLFGDDEKASASLIVVSE-DKAMEBGFNRCNSVFGAPFVSK-K-----ALPS---FEEDRKYQVWLNCKEYLDKASIIILADGDFGQALSSEASBBERGRKRVME 384  
Micromonas pusilla -----RVSPAGS-Y--VDALFFYRRNGVLVLSCKYRDI-EKFFWQ-----VKGAEFLFGDDEKASASLIVVSE-DKAMEBGFNRCNSVFGAPFVSK-K-----DLPF---FEEDRKYQVWLNCKEYLDKASIIILADGDFGQALSSEASBBERGRKRVME 277  
Selaginella moellend -----YSG-S--ELVIAFTYRRNGVLVLSCKYRDI-EKFFWQ-----ARGAARFLFGDDEKASASLIVVSE-DKAMEBGFNRCNSVFGAPFVSK-K-----ETPD---FEEDRKYQVWLNCKEYLDKASIIILADGDFGQALSSEASBBERGRKRVME 264  
Ostreococcus lucimaris -----SVSPAGS-Y--VDALFFYRRNGVLVLSCKYRDI-EKFFWQ-----VKGAEFLFGDDEKASASLIVVSE-DKAMEBGFNRCNSVFGAPFVSK-K-----DLPF---FEEDRKYQVWLNCKEYLDKASIIILADGDFGQALSSEASBBERGRKRVME 278  
Micromonas commoda -----RVSPAGS-Y--VDALFFYRRNGVLVLSCKYRDI-EKFFWQ-----VKGAEFLFGDDEKASASLIVVSE-DKAMEBGFNRCNSVFGAPFVSK-K-----DLPF---FEEDRKYQVWLNCKEYLDKASIIILADGDFGQALSSEASBBERGRKRVME 306  
Physcomitrella paten -----WA-NTDLAIAFTYRRNGVLVLSCKYRDI-EKFFWQ-----VKNAPFLFGDDEKASASLIVVSE-DKAMEBGFNRCNSVFGAPFVSK-K-----ELPF---PHEDRKYQVWLNCKEYLDKASIIILADGDFGQALSSEASBBERGRKRVME 309



|                       |    |    |                |                 |               |                              |                |        |          |    |                |      |               |          |     |
|-----------------------|----|----|----------------|-----------------|---------------|------------------------------|----------------|--------|----------|----|----------------|------|---------------|----------|-----|
| Beta vulgaris         | N6 | HL | EDDCLPFIKMWLLD | LAKAAVLRHGVRGLV | DPYNELDHQRGGS | MTETEYVSQMLTKRFAQHSCHWVFAHPQ | MINWAGEAPNLYDI | SSSAHF | INKCDNGI | VI | HNRNDEPAGPI    | DRVQ | CVCRVRNKVAGTI | GDAPLSYN | 688 |
| Camelina sativa       | D6 | SL | EDDCLPFIKMWLLD | LAKAAVLRHGVRGLV | DPYNELDHQRTR  | QTETEYVSQMLTKRFAQHSCHWVFAHPQ | LQWGDGAPNLYDI  | SSSAHF | INKCDNGI | VI | HNRNDEKAGPLDQV | QV   | CVCRVRNKVAGTI | GDAPLSYN | 689 |
| Solanum lycopersicum  | D6 | SL | EDDCLPFIKMWLLD | LAKAAVLRHGVRGLV | DPYNELDHQRFS  | QTETEYVSQMLTKRFAQHSCHWVFAHPQ | LHHVGGAPNLYDI  | SSSAHF | INKCDNGI | VI | HNRNDEPAGPDRVQ | QV   | CVCRVRNKVAGTI | GDAPLSYN | 691 |
| Vitis vinifera        | E6 | HL | EDDCLPFIKMWLLD | LAKAAVLRHGVRGLV | DPYNELDHQRFS  | QTETEYVSQMLTKRFAQHSCHWVFAHPQ | LQWGDGAPNLYDI  | SSSAHF | INKCDNGI | VI | HNRNDEPAGPDRVQ | QV   | CVCRVRNKVAGTI | GDAPLSYN | 690 |
| Tarenaya hassleriana  | D6 | SL | EDDCLPFIKMWLLD | LAKAAVLRHGVRGLV | DPYNELDHQRFS  | QTETEYVSQMLTKRFAQHSCHWVFAHPQ | LQWGDGAPNLYDI  | SSSAHF | INKCDNGI | VI | HNRNDEPAGPDRVQ | QV   | CVCRVRNKVAGTI | GDAPLSYN | 695 |
| Lupinus angustifolius | D6 | SL | EDDCLPFIKMWLLD | LAKAAVLRHGVRGLV | DPYNELDHQRFS  | QTETEYVSQMLTKRFAQHSCHWVFAHPQ | LQWGDGAPNLYDI  | SSSAHF | INKCDNGI | VI | HNRNDEPAGPDRVQ | QV   | CVCRVRNKVAGTI | GDAPLSYN | 695 |
| Nelumbo nucifera      | D6 | SL | EDDCLPFIKMWLLD | LAKAAVLRHGVRGLV | DPYNELDHQRFPN | QTETEYVSQMLTKRFAQHSCHWVFAHPQ | LHHVGGAPNLYDI  | SSSAHF | INKCDNGI | VI | HNRNDEPAGPDRVQ | QV   | CVCRVRNKVAGTI | GDAPLSYN | 780 |
| Noccaea caerulescens  | D6 | SL | EDDCLPFIKMWLLD | LAKAAVLRHGVRGLV | DPYNELDHQRTR  | QTETEYVSQMLTKRFAQHSCHWVFAHPQ | LQWGDGAPNLYDI  | SSSAHF | INKCDNGI | VI | HNRNDEPAGPDRVQ | QV   | CVCRVRNKVAGTI | GDAPLSYN | 741 |
| Juglans regia         | N6 | HL | EDDCLPFIKMWLLD | LAKAAVLRHGVRGLV | DPYNELDHQRFS  | QTETEYVSQMLTKRFAQHSCHWVFAHPQ | LHHVGGAPNLYDI  | SSSAHF | INKCDNGI | VI | HNRNDEPAGPDRVQ | QV   | CVCRVRNKVAGTI | GDAPLSYN | 734 |
| Eucalyptus grandis    | D6 | SL | EDDCLPFIKMWLLD | LAKAAVLRHGVRGLV | DPYNELDHQRFS  | QTETEYVSQMLTKRFAQHSCHWVFAHPQ | LHHVGGAPNLYDI  | SSSAHF | INKCDNGI | VI | HNRNDEPAGPDRVQ | QV   | CVCRVRNKVAGTI | GDAPLSYN | 704 |
| Musa acuminata        | D6 | SL | EDDCLPFIKMWLLD | LAKAAVLRHGVRGLV | DPYNELDHQRFPN | QTETEYVSQMLTKRFAQHSCHWVFAHPQ | LQWGDGAPNLYDI  | SSSAHF | INKCDNGI | VI | HNRNDEPAGPDRVQ | QV   | CVCRVRNKVAGTI | GDAPLSYN | 679 |
| Nicotiana tomentosif  | D6 | SL | EDDCLPFIKMWLLD | LAKAAVLRHGVRGLV | DPYNELDHQRTR  | QTETEYVSQMLTKRFAQHSCHWVFAHPQ | LQWGDGAPNLYDI  | SSSAHF | INKCDNGI | VI | HNRNDEPAGPDRVQ | QV   | CVCRVRNKVAGTI | GDAPLSYN | 540 |
| Pyrus x bretschneide  | D6 | SL | EDDCLPFIKMWLLD | LAKAAVLRHGVRGLV | DPYNELDHQRFPN | QTETEYVSQMLTKRFAQHSCHWVFAHPQ | LQWGDGAPNLYDI  | SSSAHF | INKCDNGI | VI | HNRNDEPAGPDRVQ | QV   | CVCRVRNKVAGTI | GDAPLSYN | 694 |
| Brassica rapa         | D6 | SL | EDDCLPFIKMWLLD | LAKAAVLRHGVRGLV | DPYNELDHQRTR  | QTETEYVSQMLTKRFAQHSCHWVFAHPQ | LQWGDGAPNLYDI  | SSSAHF | INKCDNGI | VI | HNRNDEKAGPLDQV | QV   | CVCRVRNKVAGTI | GDAPLSYN | 682 |
| Raphanus sativus      | D6 | SL | EDDCLPFIKMWLLD | LAKAAVLRHGVRGLV | DPYNELDHQRTR  | QTETEYVSQMLTKRFAQHSCHWVFAHPQ | LQWGDGAPNLYDI  | SSSAHF | INKCDNGI | VI | HNRNDEKAGPLDQV | QV   | CVCRVRNKVAGTI | GDAPLSYN | 686 |
| Arabidopsis thaliana  | D6 | SL | EDDCLPFIKMWLLD | LAKAAVLRHGVRGLV | DPYNELDHQRTR  | QTETEYVSQMLTKRFAQHSCHWVFAHPQ | LQWGDGAPNLYDI  | SSSAHF | INKCDNGI | VI | HNRNDEKAGPLDQV | QV   | CVCRVRNKVAGTI | GDAPLSYN | 685 |
| Theobroma cacao       | D6 | SL | EDDCLPFIKMWLLD | LAKAAVLRHGVRGLV | DPYNELDHQRFS  | QTETEYVSQMLTKRFAQHSCHWVFAHPQ | LHHVGGAPNLYDI  | SSSAHF | INKCDNGI | VI | HNRNDEPAGPDRVQ | QV   | CVCRVRNKVAGTI | GDAPLSYN | 689 |
| Phoenix dactylifera   | D6 | SL | EDDCLPFIKMWLLD | LAKAAVLRHGVRGLV | DPYNELDHQRFPN | QTETEYVSQMLTKRFAQHSCHWVFAHPQ | LQWGDGAPNLYDI  | SSSAHF | INKCDNGI | VI | HNRNDEKAGPLDQV | QV   | CVCRVRNKVAGTI | GDAPLSYN | 690 |
| Gossypium arboreum    | D6 | SL | EDDCLPFIKMWLLD | LAKAAVLRHGVRGLV | DPYNELDHQRFS  | QTETEYVSQMLTKRFAQHSCHWVFAHPQ | LHHVGGAPNLYDI  | SSSAHF | INKCDNGI | VI | HNRNDEPAGPDRVQ | QV   | CVCRVRNKVAGTI | GDAPLSYN | 681 |
| Ricinus communis      | D6 | SL | EDDCLPFIKMWLLD | LAKAAVLRHGVRGLV | DPYNELDHQRFS  | QTETEYVSQMLTKRFAQHSCHWVFAHPQ | LQWGDGAPNLYDI  | SSSAHF | INKCDNGI | VI | HNRNDEPAGPDRVQ | QV   | CVCRVRNKVAGTI | GDAPLSYN | 689 |
| Malus domestica       | D6 | SL | EDDCLPFIKMWLLD | LAKAAVLRHGVRGLV | DPYNELDHQRFPN | QTETEYVSQMLTKRFAQHSCHWVFAHPQ | LQWGDGAPNLYDI  | SSSAHF | INKCDNGI | VI | HNRNDEPAGPDRVQ | QV   | CVCRVRNKVAGTI | GDAPLSYN | 692 |
| Manihot esculenta     | D6 | SL | EDDCLPFIKMWLLD | LAKAAVLRHGVRGLV | DPYNELDHQRFS  | QTETEYVSQMLTKRFAQHSCHWVFAHPQ | LQWGDGAPNLYDI  | SSSAHF | INKCDNGI | VI | HNRNDEPAGPDRVQ | QV   | CVCRVRNKVAGTI | GDAPLSYN | 684 |
| Cucumis melo          | D6 | SL | EDDCLPFIKMWLLD | LAKAAVLRHGVRGLV | DPYNELDHQRFPN | QTETEYVSQMLTKRFAQHSCHWVFAHPQ | LQWGDGAPNLYDI  | SSSAHF | INKCDNGI | VI | HNRNDEPAGPDRVQ | QV   | CVCRVRNKVAGTI | GDAPLSYN | 689 |
| Gossypium hirsutum    | D6 | SL | EDDCLPFIKMWLLD | LAKAAVLRHGVRGLV | DPYNELDHQRFS  | QTETEYVSQMLTKRFAQHSCHWVFAHPQ | LQWGDGAPNLYDI  | SSSAHF | INKCDNGI | VI | HNRNDEPAGPDRVQ | QV   | CVCRVRNKVAGTI | GDAPLSYN | 700 |
| Prunus mume           | D6 | SL | EDDCLPFIKMWLLD | LAKAAVLRHGVRGLV | DPYNELDHQRFPN | QTETEYVSQMLTKRFAQHSCHWVFAHPQ | LQWGDGAPNLYDI  | SSSAHF | INKCDNGI | VI | HNRNDEPAGPDRVQ | QV   | CVCRVRNKVAGTI | GDAPLSYN | 682 |
| Marchantia polymorpha | Q6 | FL | EDDCLPFIKMWLLD | LAKAAVLRHGVRGLV | DPYNELDHQRFS  | QTETEYVSQMLTKRFAQHSCHWVFAHPQ | LQWGDGAPNLYDI  | SSSAHF | INKCDNGI | VI | HNRNDEPAGPDRVQ | QV   | CVCRVRNKVAGTI | GDAPLSYN | 787 |
| Capsicum annuum       | D6 | SL | EDDCLPFIKMWLLD | LAKAAVLRHGVRGLV | DPYNELDHQRFS  | QTETEYVSQMLTKRFAQHSCHWVFAHPQ | LHHVGGAPNLYDI  | SSSAHF | INKCDNGI | VI | HNRNDEPAGPDRVQ | QV   | CVCRVRNKVAGTI | GDAPLSYN | 676 |
| Nicotiana tabacum     | D6 | SL | EDDCLPFIKMWLLD | LAKAAVLRHGVRGLV | DPYNELDHQRFPN | QTETEYVSQMLTKRFAQHSCHWVFAHPQ | LQWGDGAPNLYDI  | SSSAHF | INKCDNGI | VI | HNRNDEPAGPDRVQ | QV   | CVCRVRNKVAGTI | GDAPLSYN | 540 |
| Arachis ipaensis      | D6 | SL | EDDCLPFIKMWLLD | LAKAAVLRHGVRGLV | DPYNELDHQRFPN | QTETEYVSQMLTKRFAQHSCHWVFAHPQ | LHHVGGAPNLYDI  | SSSAHF | INKCDNGI | VI | HNRNDEPAGPDRVQ | QV   | CVCRVRNKVAGTI | GDAPLSYN | 676 |
| Daucus carota         | D6 | SL | EDDCLPFIKMWLLD | LAKAAVLRHGVRGLV | DPYNELDHQRFPN | QTETEYVSQMLTKRFAQHSCHWVFAHPQ | LHHVGGAPNLYDI  | SSSAHF | INKCDNGI | VI | HNRNDEPAGPDRVQ | QV   | CVCRVRNKVAGTI | GDAPLSYN | 671 |
| Arachis duranensis    | E6 | HL | EDDCLPFIKMWLLD | LAKAAVLRHGVRGLV | DPYNELDHQRFS  | QTETEYVSQMLTKRFAQHSCHWVFAHPQ | LHHVGGAPNLYDI  | SSSAHF | INKCDNGI | VI | HNRNDEPAGPDRVQ | QV   | CVCRVRNKVAGTI | GDAPLSYN | 674 |
| Oryza sativa          | E6 | HL | EDDCLPFIKMWLLD | LAKAAVLRHGVRGLV | DPYNELDHQRFS  | QTETEYVSQMLTKRFAQHSCHWVFAHPQ | LHHVGGAPNLYDI  | SSSAHF | INKCDNGI | VI | HNRNDEPAGPDRVQ | QV   | CVCRVRNKVAGTI | GDAPLSYN | 691 |
| Sorghum bicolor       | E6 | HL | EDDCLPFIKMWLLD | LAKAAVLRHGVRGLV | DPYNELDHQRFS  | QTETEYVSQMLTKRFAQHSCHWVFAHPQ | LHHVGGAPNLYDI  | SSSAHF | INKCDNGI | VI | HNRNDEPAGPDRVQ | QV   | CVCRVRNKVAGTI | GDAPLSYN | 697 |
| Citrus sinensis       | N6 | HL | EDDCLPFIKMWLLD | LAKAAVLRHGVRGLV | DPYNELDHQRFS  | QTETEYVSQMLTKRFAQHSCHWVFAHPQ | LHHVGGAPNLYDI  | SSSAHF | INKCDNGI | VI | HNRNDEPAGPDRVQ | QV   | CVCRVRNKVAGTI | GDAPLSYN | 699 |
| Cynara cardunculus    | D6 | SL | EDDCLPFIKMWLLD | LAKAAVLRHGVRGLV | DPYNELDHQRFPN | QTETEYVSQMLTKRFAQHSCHWVFAHPQ | LQWGDGAPNLYDI  | SSSAHF | INKCDNGI | VI | HNRNDEPAGPDRVQ | QV   | CVCRVRNKVAGTI | GDAPLSYN | 626 |
| Solanum tuberosum     | D6 | SL | EDDCLPFIKMWLLD | LAKAAVLRHGVRGLV | DPYNELDHQRFS  | QTETEYVSQMLTKRFAQHSCHWVFAHPQ | LHHVGGAPNLYDI  | SSSAHF | INKCDNGI | VI | HNRNDEPAGPDRVQ | QV   | CVCRVRNKVAGTI | GDAPLSYN | 679 |
| Solanum pennellii     | D6 | SL | EDDCLPFIKMWLLD | LAKAAVLRHGVRGLV | DPYNELDHQRFS  | QTETEYVSQMLTKRFAQHSCHWVFAHPQ | LHHVGGAPNLYDI  | SSSAHF | INKCDNGI | VI | HNRNDEPAGPDRVQ | QV   | CVCRVRNKVAGTI | GDAPLSYN | 681 |
| Brachypodium distach  | D6 | SL | EDDCLPFIKMWLLD | LAKAAVLRHGVRGLV | DPYNELDHQRFPN | QTETEYVSQMLTKRFAQHSCHWVFAHPQ | LQWGDGAPNLYDI  | SSSAHF | INKCDNGI | VI | HNRNDEPAGPDRVQ | QV   | CVCRVRNKVAGTI | GDAPLSYN | 694 |
| Setaria italica       | E6 | HL | EDDCLPFIKMWLLD | LAKAAVLRHGVRGLV | DPYNELDHQRFS  | QTETEYVSQMLTKRFAQHSCHWVFAHPQ | LHHVGGAPNLYDI  | SSSAHF | INKCDNGI | VI | HNRNDEPAGPDRVQ | QV   | CVCRVRNKVAGTI | GDAPLSYN | 698 |
| Vigna radiata         | D6 | SL | EDDCLPFIKMWLLD | LAKAAVLRHGVRGLV | DPYNELDHQRFPN | QTETEYVSQMLTKRFAQHSCHWVFAHPQ | LQWGDGAPNLYDI  | SSSAHF | INKCDNGI | VI | HNRNDEPAGPDRVQ | QV   | CVCRVRNKVAGTI | GDAPLSYN | 679 |
| Brassica oleracea     | D6 | SL | EDDCLPFIKMWLLD | LAKAAVLRHGVRGLV | DPYNELDHQRTR  | QTETEYVSQMLTKRFAQHSCHWVFAHPQ | LQWGDGAPNLYDI  | SSSAHF | INKCDNGI | VI | HNRNDEKAGPLDQV | QV   | CVCRVRNKVAGTI | GDAPLSYN | 685 |
| Medicago truncatula   | D6 | SL | EDDCLPFIKMWLLD | LAKAAVLRHGVRGLV | DPYNELDHQRFPN | QTETEYVSQMLTKRFAQHSCHWVFAHPQ | LHHVGGAPNLYDI  | SSSAHF | INKCDNGI | VI | HNRNDEPAGPDRVQ | QV   | CVCRVRNKVAGTI | GDAPLSYN | 674 |
| Zostera marina        | D6 | SL | EDDCLPFIKMWLLD | LAKAAVLRHGVRGLV | DPYNELDHQRFPN | QTETEYVSQMLTKRFAQHSCHWVFAHPQ | LQWGDGAPNLYDI  | SSSAHF | INKCDNGI | VI | HNRNDEPAGPDRVQ | QV   | CVCRVRNKVAGTI | GDAPLSYN | 673 |
| Erythranthe guttata   | D6 | SL | EDDCLPFIKMWLLD | LAKAAVLRHGVRGLV | DPYNELDHQRFS  | QTETEYVSQMLTKRFAQHSCHWVFAHPQ | LQWGDGAPNLYDI  | SSSAHF | INKCDNGI | VI | HNRNDEPAGPDRVQ | QV   | CVCRVRNKVAGTI | GDAPLSYN | 700 |
| Coccomyxa subellipso  | E6 | HL | EDDCLPFIKMWLLD | LAKAAVLRHGVRGLV | DPYNELDHQRFPN | QTETEYVSQMLTKRFAQHSCHWVFAHPQ | LQWGDGAPNLYDI  | SSSAHF | INKCDNGI | VI | HNRNDEPAGPDRVQ | QV   | CVCRVRNKVAGTI | GDAPLSYN | 589 |
| Cicer arietinum       | D6 | SL | EDDCLPFIKMWLLD | LAKAAVLRHGVRGLV | DPYNELDHQRFPN | QTETEYVSQMLTKRFAQHSCHWVFAHPQ | LHHVGGAPNLYDI  | SSSAHF | INKCDNGI | VI | HNRNDEPAGPDRVQ | QV   | CVCRVRNKVAGTI | GDAPLSYN | 684 |
| Gossypium raimondii   | D6 | SL | EDDCLPFIKMWLLD | LAKAAVLRHGVRGLV | DPYNELDHQRFPN | QTETEYVSQMLTKRFAQHSCHWVFAHPQ | LHHVGGAPNLYDI  | SSSAHF | INKCDNGI | VI | HNRNDEPAGPDRVQ | QV   | CVCRVRNKVAGTI | GDAPLSYN | 689 |
| Cucumis sativus       | D6 | SL | EDDCLPFIKMWLLD | LAKAAVLRHGVRGLV | DPYNELDHQRFPN | QTETEYVSQMLTKRFAQHSCHWVFAHPQ | LQWGDGAPNLYDI  | SSSAHF | INKCDNGI | VI | HNRNDEPAGPDRVQ | QV   | CVCRVRNKVAGTI | GDAPLSYN | 697 |
| Aegilops tauschii     | E6 | HL | EDDCLPFIKMWLLD | LAKAAVLRHGVRGLV | DPYNELDHQRFPN | QTETEYVSQMLTKRFAQHSCHWVFAHPQ | LQWGDGAPNLYDI  | SSSAHF | INKCDNGI | VI | HNRNDEPAGPDRVQ | QV   | CVCRVRNKVAGTI | GDAPLSYN | 603 |
| Amborella trichopoda  | D6 | SL | EDDCLPFIKMWLLD | LAKAAVLRHGVRGLV | DPYNELDHQRFPN | QTETEYVSQMLTKRFAQHSCHWVFAHPQ | LQWGDGAPNLYDI  | SSSAHF | INKCDNGI | VI | HNRNDEPAGPDRVQ | QV   | CVCRVRNKVAGTI | GDAPLSYN | 676 |
| Arabidopsis lyrata    | E6 | HL | EDDCLPFIKMWLLD | LAKAAVLRHGVRGLV | DPYNELDHQRFPN | QTETEYVSQMLTKRFAQHSCHWVFAHPQ | LHHVGGAPNLYDI  | SSSAHF | INKCDNGI | VI | HNRNDEPAGPDRVQ | QV   | CVCRVRNKVAGTI | GDAPLSYN | 686 |
| Sesamum indicum       | D6 | SL | EDDCLPFIKMWLLD | LAKAAVLRHGVRGLV | DPYNELDHQRFPN | QTETEYVSQMLTKRFAQHSCHWVFAHPQ | LHHVGGAPNLYDI  | SSSAHF | INKCDNGI | VI | HNRNDEPAGPDRVQ | QV   | CVCRVRNKVAGTI | GDAPLSYN | 608 |
| Populus euphratica    | D6 | SL | EDDCLPFIKMWLLD | LAKAAVLRHGVRGLV | DPYNELDHQRFPN | QTETEYVSQMLTKRFAQHSCHWVFAHPQ | LQWGDGAPNLYDI  | SSSAHF | INKCDNGI | VI | HNRNDEPAGPDRVQ | QV   | CVCRVRNKVAGTI | GDAPLSYN | 690 |
| Morus notabilis       | E6 | HL | EDDCLPFIKMWLLD | LAKAAVLRHGVRGLV | DPYNELDHQRFPN | QTETEYVSQMLTKRFAQHSCHWVFAHPQ | LQWGDGAPNLYDI  | SSSAHF | INKCDNGI | VI | HNRNDEPAGPDRVQ | QV   | CVCRVRNKVAGTI | GDAPLSYN | 695 |
| Nicotiana glauca      | D6 | SL | EDDCLPFIKMWLLD | LAKAAVLRHGVRGLV | DPYNELDHQRFPN | QTETEYVSQMLTKRFAQHSCHWVFAHPQ | LHHVGGAPNLYDI  | SSSAHF | INKCDNGI | VI | HNRNDEPAGPDRVQ | QV   | CVCRVRNKVAGTI | GDAPLSYN | 693 |
| Capsella rubella      | E6 | HL | EDDCLPFIKMWLLD | LAKAAVLRHGVRGLV | DPYNELDHQRTR  | QTETEYVSQMLTKRFAQHSCHWVFAHPQ | LQWGDGAPNLYDI  | SSSAHF | INKCDNGI | VI | HNRNDEKAGPLDQV | QV   | CVCRVRNKVAGTI | GDAPLSYN | 681 |
| Arabidopsis lyrata    | D6 | SL | EDDCLPFIKMWLLD | LAKAAVLRHGVRGLV | DPYNELDHQRTR  | QTETEYVSQMLTKRFAQHSCHWVFAHPQ | LQWGDGAPNLYDI  | SSSAHF | INKCDNGI | VI | HNRNDEKAGPLDQV | QV   | CVCRVRNKVAGTI | GDAPLSYN | 674 |
| Zeaxanthin            | K6 | HL | EDDCLPFIKMWLLD | LAKAAVLRHGVRGLV | DPYNELDHQRFPN | QTETEYVSQMLTKRFAQHSCHWVFAHPQ | LQWGDGAPNLYDI  | SSSAHF | INKCDNGI | VI | HNRNDEPAGPDRVQ | QV   | CVCRVRNKVAGTI | GDAPLSYN | 674 |
| Jatropha curcas       | D6 | SL | EDDCLPFIKMWLLD | LAKAAVLRHGVRGLV | DPYNELDHQRFPN | QTETEYVSQMLTKRFAQHSCHWVFAHPQ | LHHVGGAPNLYDI  | SSSAHF | INKCDNGI | VI | HNRNDEPAGPDRVQ | QV   | CVCRVRNKVAGTI | GDAPLSYN | 749 |
| Eutrema salsugineum   | D6 | SL | EDDCLPFIKMWLLD | LAKAAVLRHGVRGLV | DPYNELDHQRTR  | QTETEYVSQMLTKRFAQHSCHWVFAHPQ | LQWGDGAPNLYDI  | SSSAHF | INKCDNGI | VI | HNRNDEKAGPLDQV | QV   | CVCRVRNKVAGTI | GDAPLSYN | 667 |
| Prunus persica        | D6 | SL | EDDCLPFIKMWLLD | LAKAAVLRHGVRGLV | DPYNELDHQRFPN | QTETEYVSQMLTKRFAQHSCHWVFAHPQ | LQWGDGAPNLYDI  | SSSAHF | INKCDNGI | VI | HNRNDEPAGPDRVQ | QV   | CVCRVRNKVAGTI | GDAPLSYN | 597 |
| Phaseolus vulgaris    | D6 | SL | EDDCLPFIKMWLLD | LAKAAVLRHGVRGLV | DPYNELDHQRFPN | QTETEYVSQMLTKRFAQHSCHWVFAHPQ | LHHVGGAPNLYDI  | SSSAHF | INKCDNGI | VI | HNRNDEPAGPDRVQ | QV   | CVCRVRNKVAGTI | GDAPLSYN | 679 |
| Populus trichocarpa   | D6 | SL | EDDCLPFIKMWLLD | LAKAAVLRHGVRGLV | DPYNELDHQRFPN | QTETEYVSQMLTKRFAQHSCHWVFAHPQ | LQWGDGAPNLYDI  | SSSAHF | INKCDNGI | VI | HNRNDEPAGPDRVQ | QV   | CVCRVRNKVAGTI | GDAPLSYN | 633 |
| Citrus clementina     | N6 | HL | EDDCLPFIKMWLLD | LAKAAVLRHGVRGLV | DPYNELDHQRFPN | QTETEYVSQMLTKRFAQHSCHWVFAHPQ | LHHVGGAPNLYDI  | SSSAHF | INKCDNGI | VI | HNRNDEPAGPDRVQ | QV   | CVCRVRNKVAGTI | GDAPLS   |     |



|                        |                                                                           |     |
|------------------------|---------------------------------------------------------------------------|-----|
| Beta vulgaris          | -----SDGWCRVT--GEFTDLT-----DPES-----                                      | 707 |
| Camelina sativa        | -----RAT--GLYSDSP-----ETPEMRLNKRH-----                                    | 710 |
| Solanum lycopersicum   | -----RVT--GEFMDID-----EHPKRG-----                                         | 697 |
| Vitis vinifera         | -----RIG--GVYTDID-----EPTSSE-----                                         | 705 |
| Tarenaya hassleriana   | -----RAT--GLFSDLE-----KR-----                                             | 707 |
| Lupinus angustifolius  | -----RVT--GEFMPAD-----NDMKA-----                                          | 695 |
| Nelumbo nucifera       | -----RTT--GEFKDID-----ETPSKN-----                                         | 769 |
| Noccaea caerulescens   | -----RAT--GVYSDCN-----VTPLTSSRSNKR-----                                   | 765 |
| Juglans regia          | -----RVT--GEFMDID-----EFSGKR-----                                         | 750 |
| Eucalyptus grandis     | -----RVT--GEFMDID-----APFKK-----                                          | 720 |
| Musa acuminata         | -----RTT--GEFEDID-----VRAISMSITRGG-----                                   | 701 |
| Nicotiana tomentosif   | -----RVT--GVYTDID-----EPKQKQ-----                                         | 705 |
| Pyrus x bretschneide   | -----RAT--GQFMDVE-----NTQKSR-----                                         | 710 |
| Brassica rapa          | -----RAT--GLFSDSP-----ITPEKPERSSRRQ-----                                  | 706 |
| Raphanus sativus       | -----RAT--GLFSDSP-----ITPEKPERSSRRP-----                                  | 710 |
| Arabidopsis thaliana   | -----RTT--GSYSDSP-----VTPGMPERRSPKRY-----                                 | 709 |
| Theobroma cacao        | -----RVT--GVYTDID-----EPKQKQ-----                                         | 705 |
| Phoenix dactylifera    | -----RVT--GEFMDID-----DKDQKQT-----                                        | 699 |
| Gossypium arboreum     | -----RVT--GVYNDID-----ESQKK-----                                          | 704 |
| Ricinus communis       | -----RYENHGTF-----RAT--GQFMDVE-----NTRKST-----                            | 700 |
| Malus domestica        | -----RAT--GQFMDVE-----NTRKST-----                                         | 710 |
| Manihot esculenta      | -----RVT--GEFMDIA-----GEMKLRKSSC-----                                     | 694 |
| Cucumis melo           | -----RVT--GEFSDAA-----GEMKLRKSSC-----                                     | 729 |
| Gossypium hirsutum     | -----RVT--GVYNDID-----ESQKK-----                                          | 704 |
| Prunus mume            | -----RAT--GQFKDIG-----IEKST-----                                          | 698 |
| Marchantia polymorph   | -----RAT--GEYADVI-----                                                    | 737 |
| Capsicum annuum        | -----RVT--GEFMDID-----EHPKRG-----                                         | 692 |
| Nicotiana tabacum      | -----RVT--GEFTPVD-----KSKK-----                                           | 691 |
| Arachis ipaensis       | -----RVT--GVYVDSN-----NTCAVDP-----                                        | 698 |
| Daucus carota          | -----RAT--GEYADVI-----KSKK-----                                           | 689 |
| Arachis duranensis     | -----RVS--GEFRDAD-----KDTAKKAAVAANVAK-----APQRKG-----                     | 723 |
| Oryza sativa           | -----RVT--GQYKADG-----KSTIAAVTAVQNRQNSYAKSKKDNVAYEMFFHPVEDDSVAEDDGSFGLNSA | 761 |
| Sorghum bicolor        | -----RVT--GEYMDIV-----                                                    | 709 |
| Citrus sinensis        | -----RVT--GEYMDIV-----                                                    | 709 |
| Cynara cardunculus     | -----RVT--GEYLDIKFKDLKIISTLPTSLLKTPRTERTHITNFNT-----                      | 666 |
| Solanum tuberosum      | -----RVT--GEFMDID-----EHPKRG-----                                         | 695 |
| Solanum pennellii      | -----RVT--GEFMDID-----EHPKRG-----                                         | 697 |
| Brachypodium distach   | -----RVT--GEYKADG-----KBIIVAKVVKQSKKTAIRR-----                            | 723 |
| Setaria italica        | -----RVT--GQFRDAG-----KATIAAATAAQTATRNNSYKSTKDNVAYEMVPHVAEDDSVGLDSL-----  | 759 |
| Vigna radiata          | -----RVT--GEYTATD-----SKRPTDRK-----                                       | 698 |
| Brassica oleracea      | -----RAT--GLFSDSP-----ITPEKPERSSRRP-----                                  | 709 |
| Medicago truncatula    | -----RVT--GEYSEDD-----RKR-----                                            | 687 |
| Zostera marina         | -----RVT--GEYSDLS-----QD-----                                             | 685 |
| Erythranthe guttata    | -----RVT--GEYMDIN-----NTSQNGKRGQ-----                                     | 721 |
| Coccomyxa subellipso   | -----RTT--GRYKDL-----                                                     | 599 |
| Cicer arietinum        | -----RVT--GEYVDDD-----SKR-----                                            | 697 |
| Gossypium raimondii    | -----RVT--GVYKID-----ESQKK-----                                           | 704 |
| Cucumis sativus        | -----RVT--GEFLDAA-----GDVKLKKPSS-----                                     | 717 |
| Aegilops tauschii      | -----RTT--GEYKAD-----EAIIVAKVVKQIRQKSTSYQR-----                           | 634 |
| Amborella trichopoda   | -----RAT--GEYKAD-----EGH-----                                             | 689 |
| Fragaria vesca         | -----RAT--GRYMDIF-----KANEK-----                                          | 702 |
| Sesamum indicum        | -----RVT--GEYSDID-----AAALIKHRA-----                                      | 628 |
| Populus euphratica     | -----RVT--GEFMNVD-----KSTGSDNGGFKPLRR-----                                | 715 |
| Morus notabilis        | -----RVT--GRYDIDQ-----                                                    | 705 |
| Nicotiana sylvestris   | -----RVT--GEFMDLD-----EHPKRG-----                                         | 699 |
| Capsella rubella       | -----RTT--GLYSDSP-----VSLVMPERRSNKR-----                                  | 715 |
| Arabis alpina          | -----RAT--GLFSDSP-----VTPERDRANR-----                                     | 698 |
| Zea mays               | -----RVT--GEFKDAG-----KATAPSAAKQSRKEAYKMPFQHAEDGENSGL-----                | 794 |
| Jatropha curcas        | -----RVT--GEFMDID-----                                                    | 670 |
| Eutrema salsugineum    | -----GCRTNW-----                                                          | 673 |
| Prunus persica         | -----RAT--GQFKDIG-----IKKST-----                                          | 612 |
| Phaseolus vulgaris     | -----RVT--GEYTPD-----KKPTDRK-----                                         | 697 |
| Populus trichocarpa    | -----RVT--GEFMNVD-----KSTGSDNGGFKPLRR-----                                | 658 |
| Citrus clementina      | -----RVT--GEYMDIV-----                                                    | 599 |
| Genlisea aurea         | -----R-----                                                               | 637 |
| Ostreococcus tauri     | -----VAN--GRYVDVV-----GAGEPLEE-----                                       | 699 |
| Micromonas pusilla     | -----LSN--GRYEDLK-----GAGEPLEE-----                                       | 597 |
| Selaginella moellend   | WLIVCSSPLVSFLLNSLKLAFCRVT--GLFSDAGPV-----                                 | 618 |
| Ostreococcus lucimaris | -----VSN--GRYVDI-----                                                     | 592 |
| Micromonas commoda     | -----LTV--GRYEDLK-----                                                    | 622 |
| Physcomitrella paten   | -----RVT--GDYEDVR-----D-----                                              | 630 |

$\alpha$ -<sup>32</sup>P rATP

Fig S3

3' 5' p  
5' TTTTTT X X X TTTTTT 3'

A

C

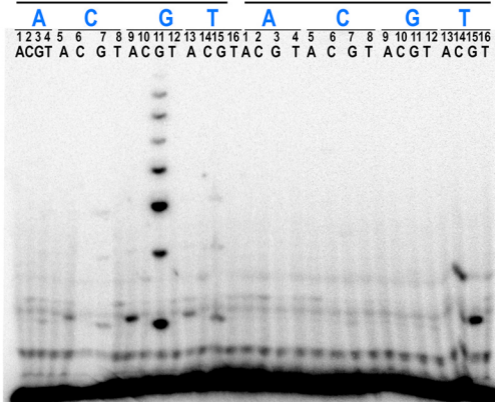

G

T

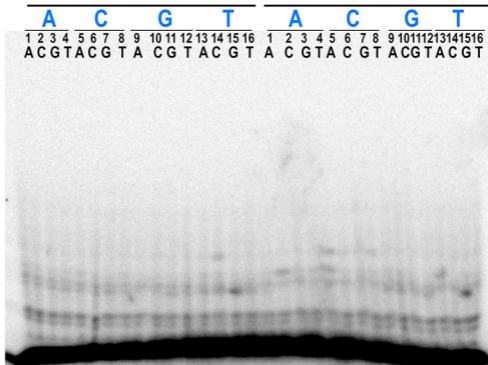

# $\alpha$ -<sup>32</sup>P rCTP Fig S4

3' 5' p  
5' TTTTTT X X X TTTTTT 3'

A

C

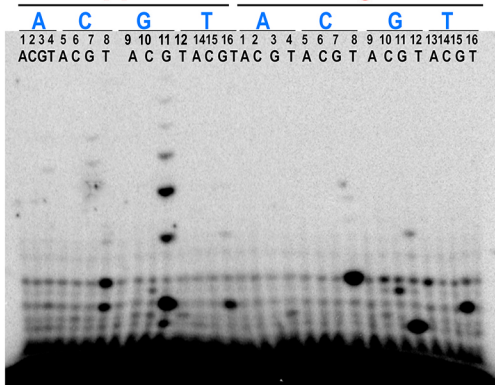

G

T

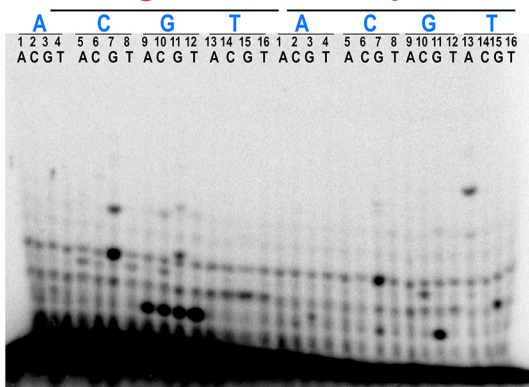

# $\alpha$ -<sup>32</sup>P rGTP Fig S5

3' 5' p  
5' TTTTTT X X X TTTTTT 3'

**A**

**C**

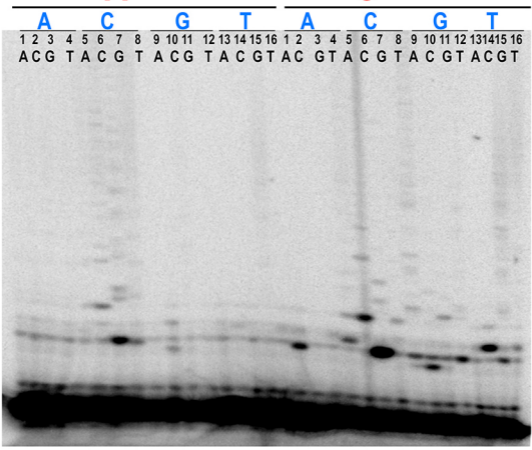

**G**

**T**

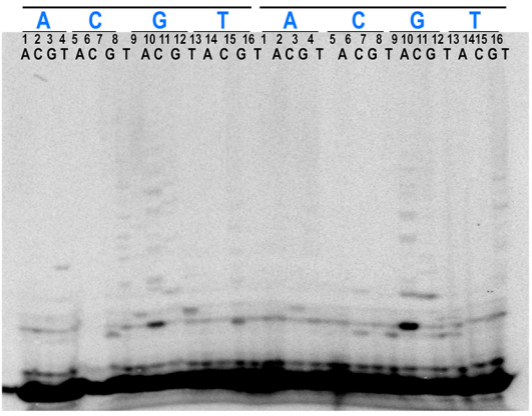

# $\alpha$ -<sup>32</sup>P UTP

# Fig S6

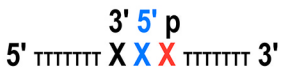

**A**

**C**

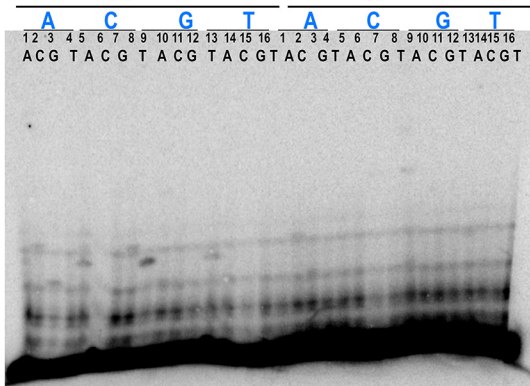

**G**

**T**

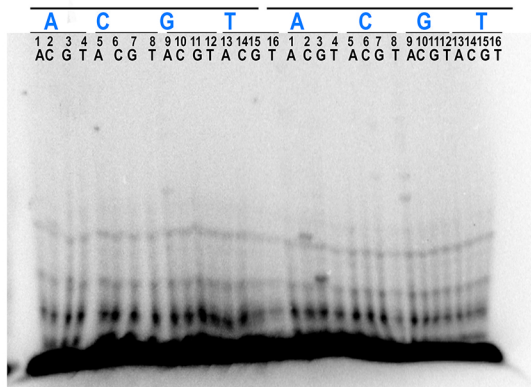

Fig S7

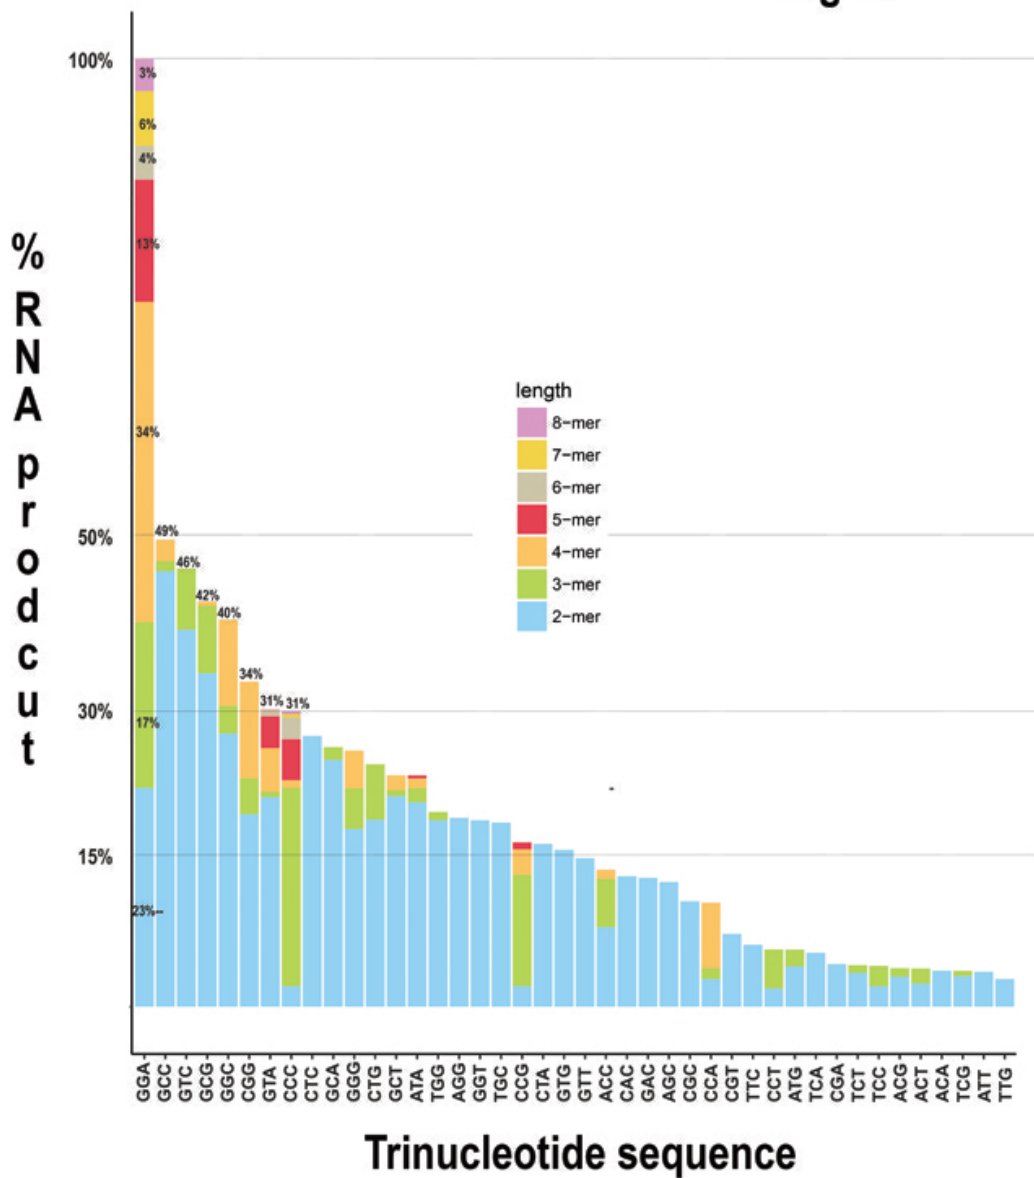

Supplement: gkx745_supp.pdf [file gkx745_supp.pdf]
